# Supplementary figures and images for: Single-cell RNA-Seq&nbsp;Reveals Transcriptional Landscape and Intra-tumor Heterogenicity in Gallbladder Cancer Liver Metastasis Microenvironment
Source: Research Square preprint supplement (doi:10.21203/rs.3.rs-117830/v1), 2020-12-07

## Malignant Cell

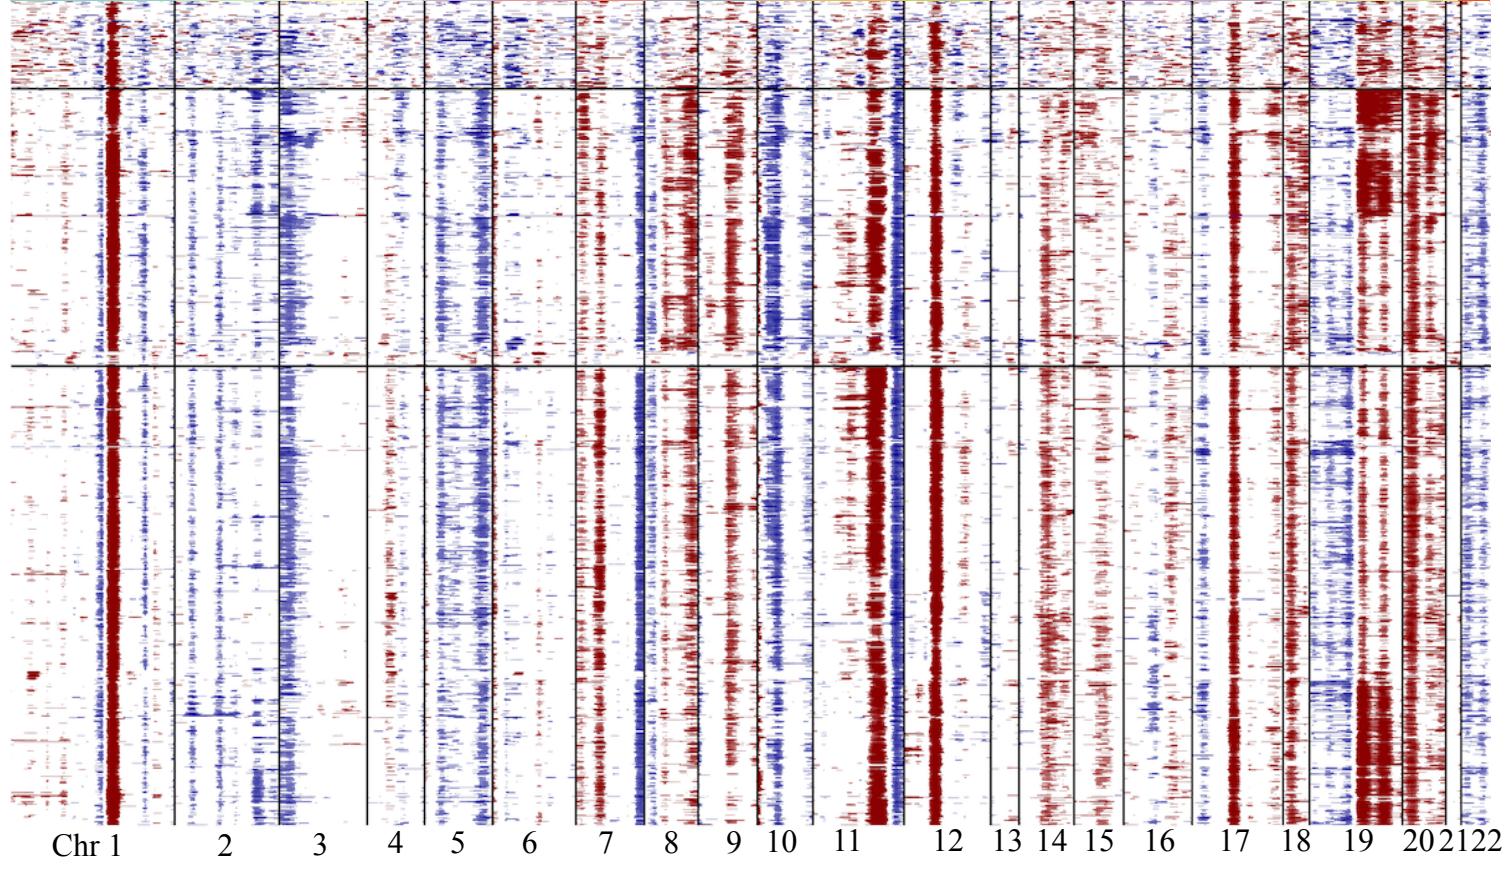

## Non-malignant Cell

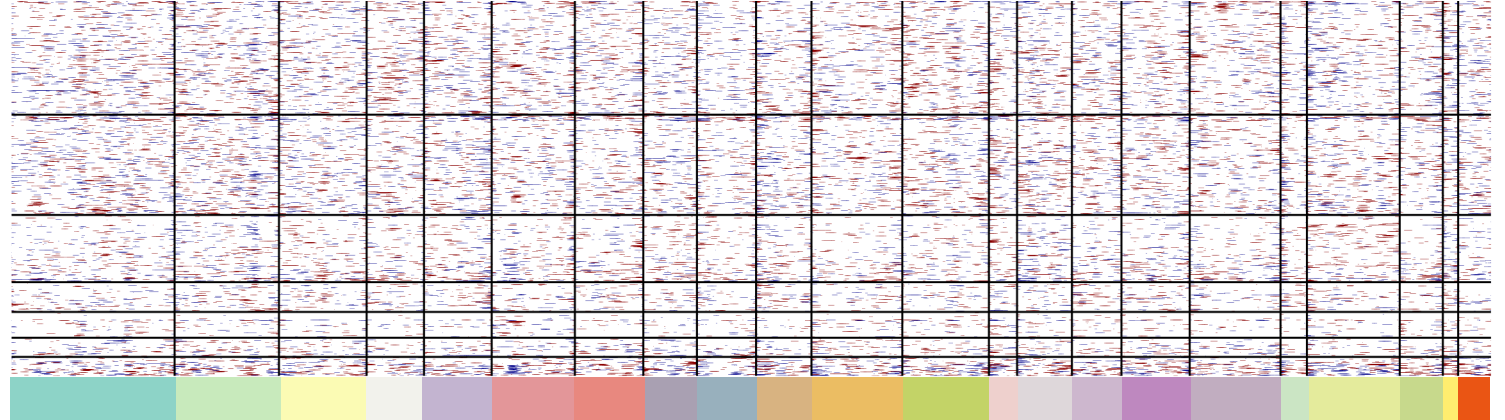

Chr 1

2

3

4

5

6

7

8

9

10

11

12

13

14

15

16

17

18

19

20

21

22

Supplement: Supplementary file 1 [file 2d7dfbc6bc0fb85452a390c3.pdf]

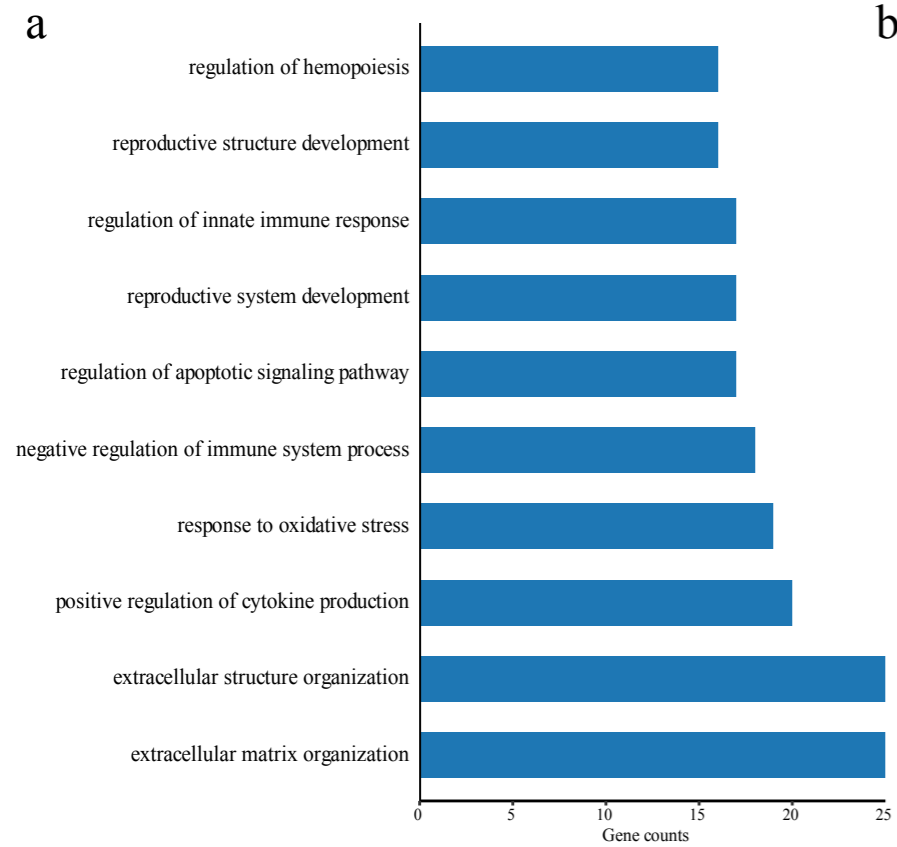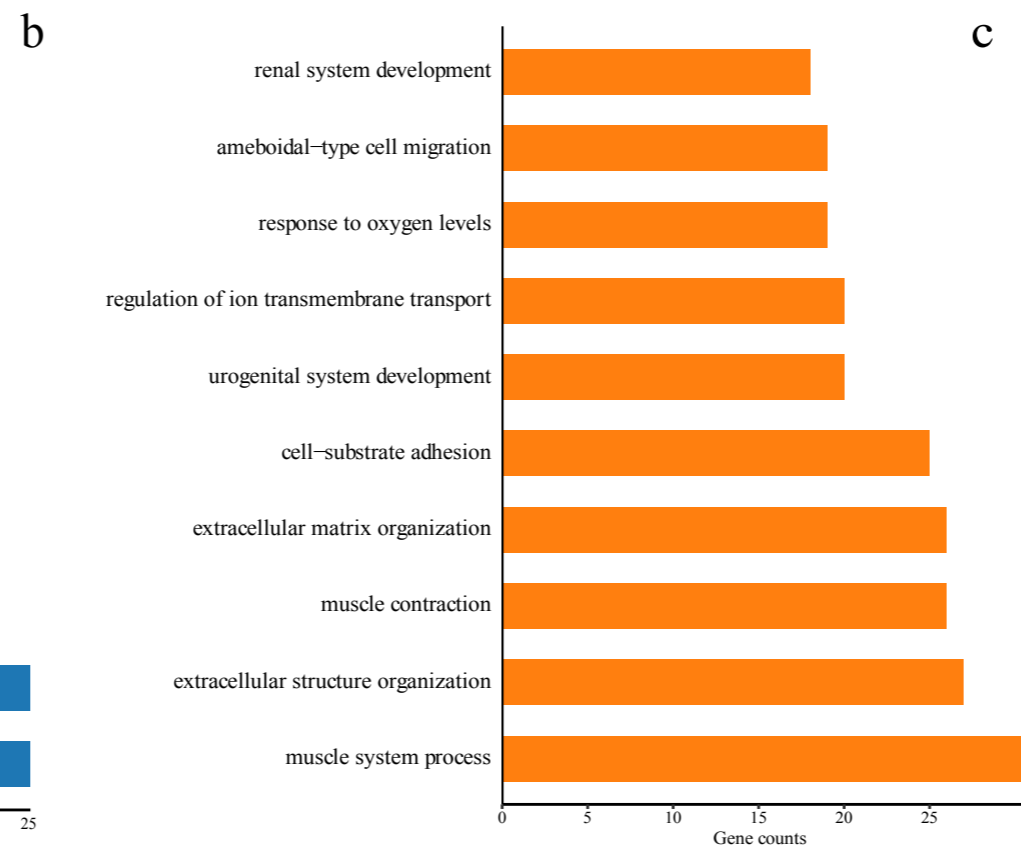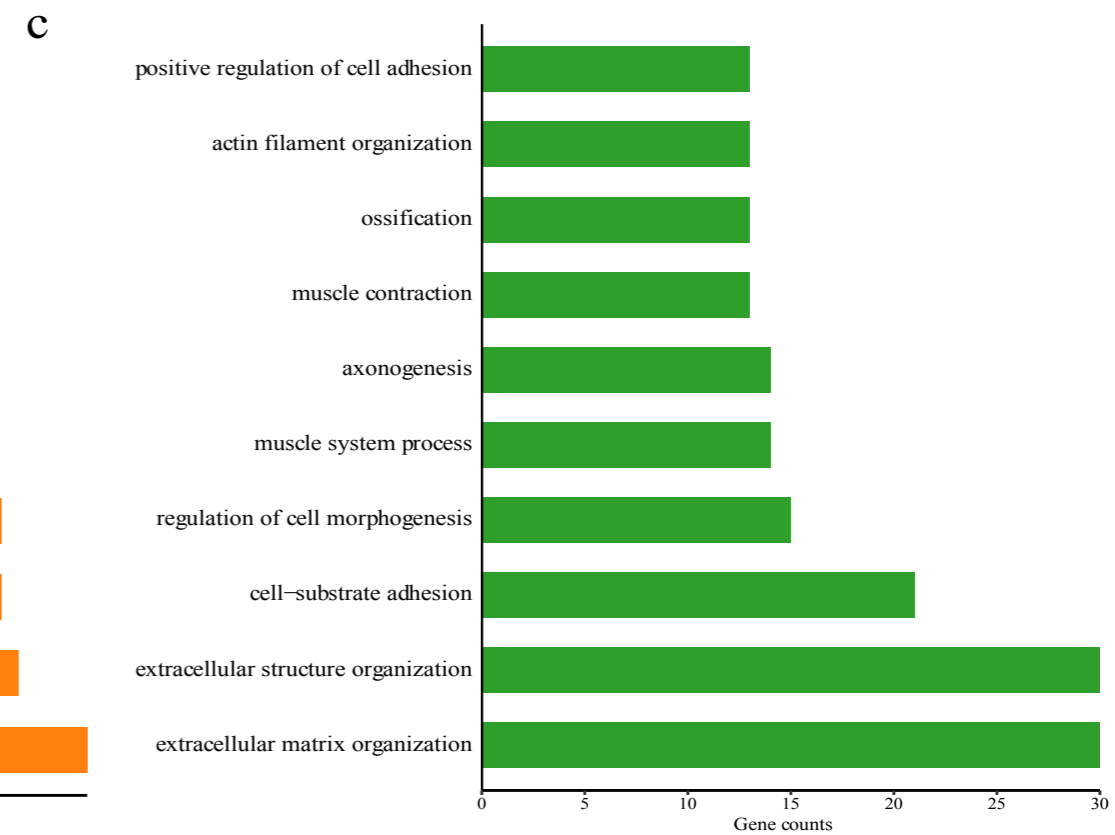

Supplement: Supplementary file 2 [file 4fc5cbf6444093ea7f1b3d58.pdf]

a

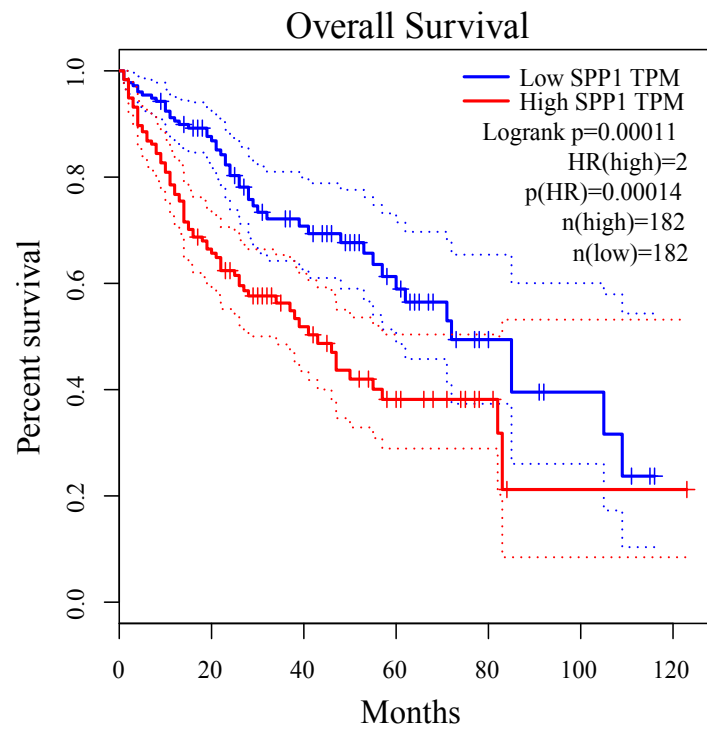

b

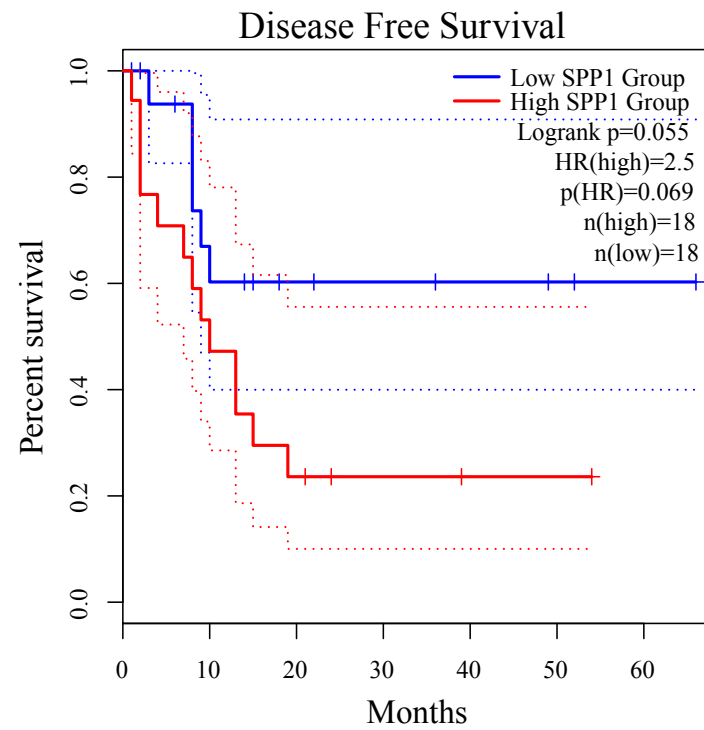

Supplement: Supplementary file 3 [file 5b7fd569659c4f62878d5492.pdf]

T cell

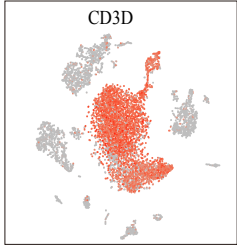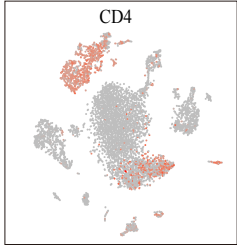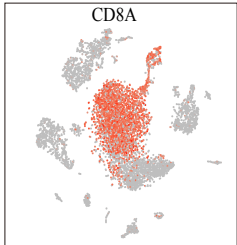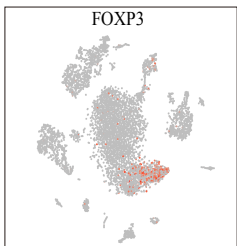

Macrophage

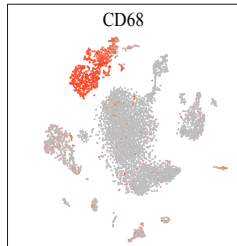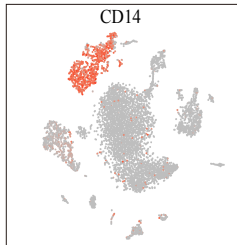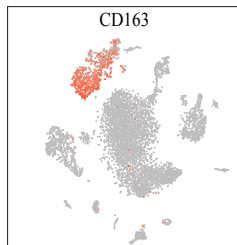

Cancer cell

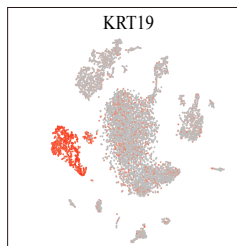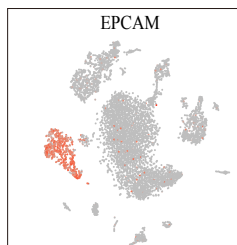

Fibroblast

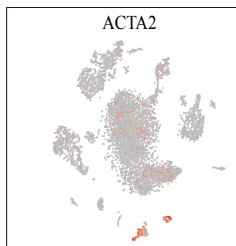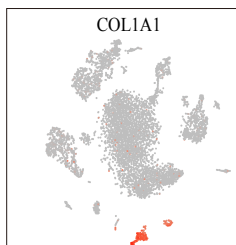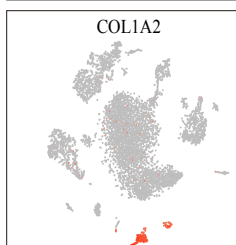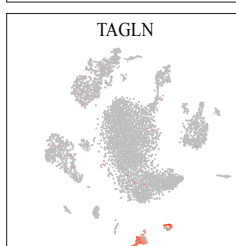

B cell

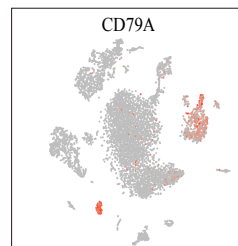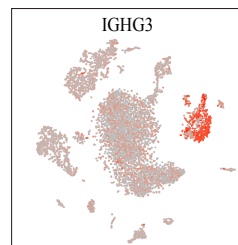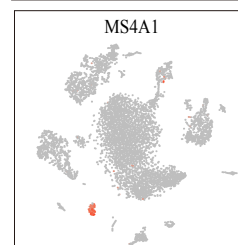

Dendritic cell

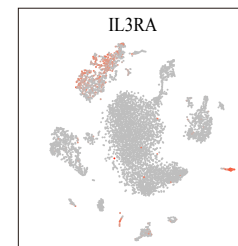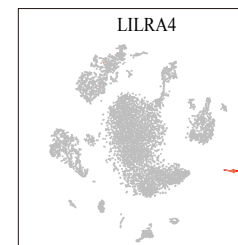

Endothelial

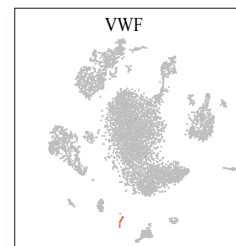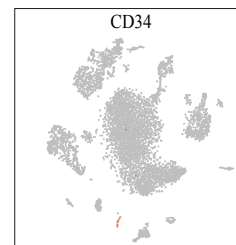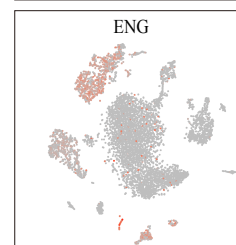

Mast cell

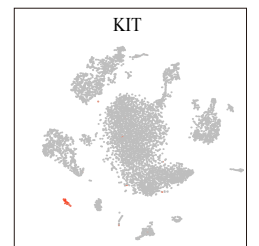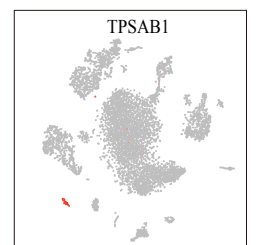

Supplement: Supplementary file 4 [file 75025187412dfdd9cefc181a.pdf]

**a**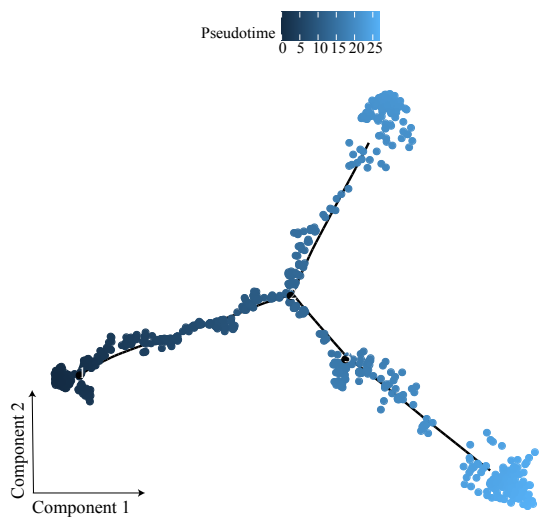**b**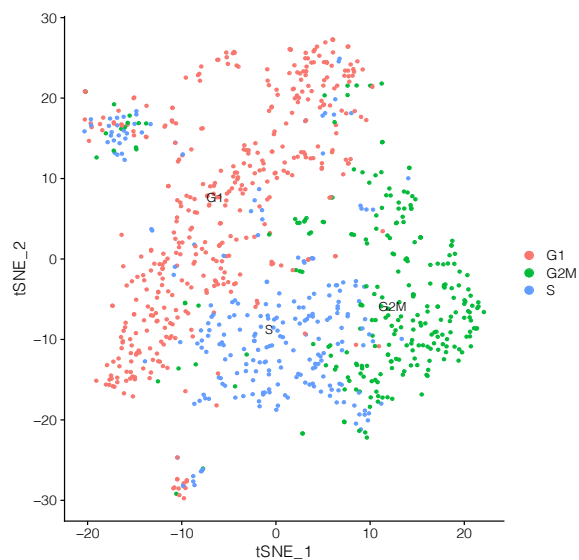**c**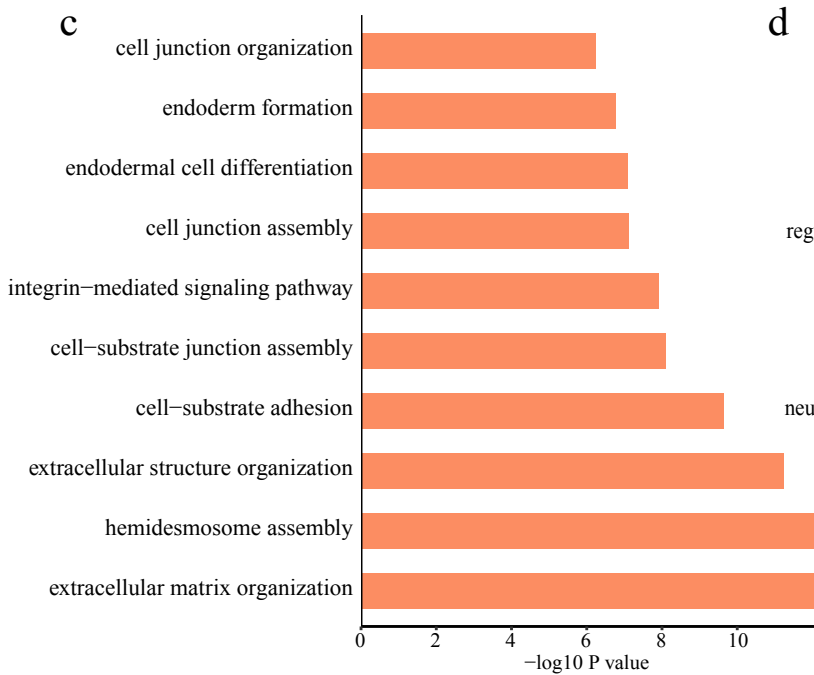**d**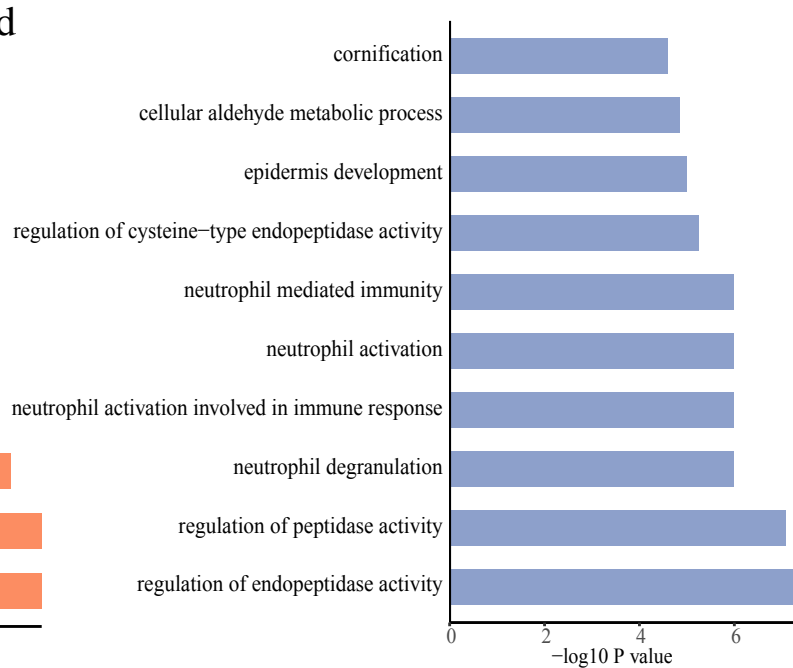**e**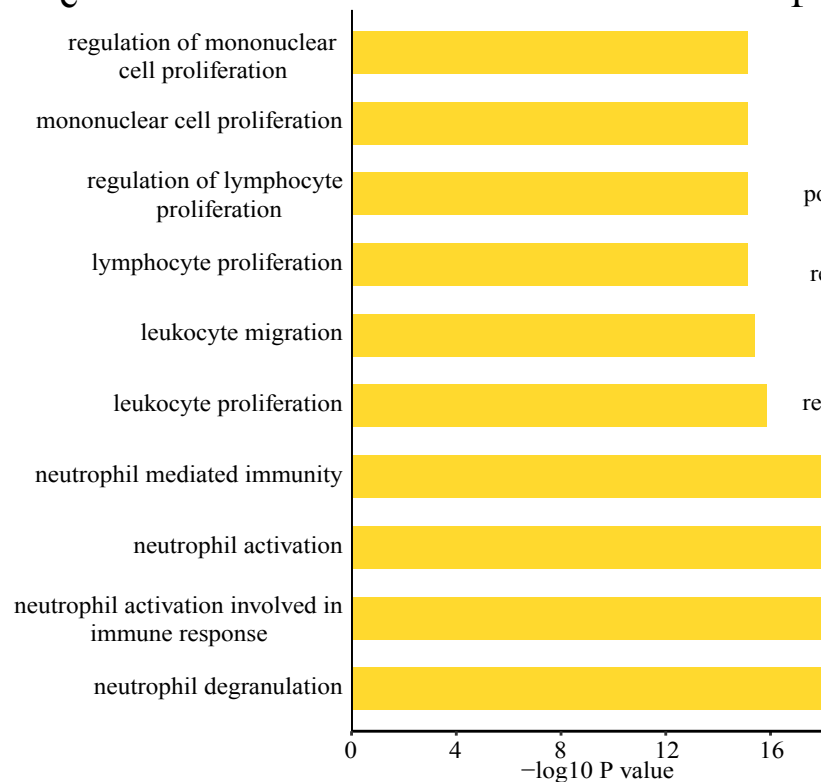**f**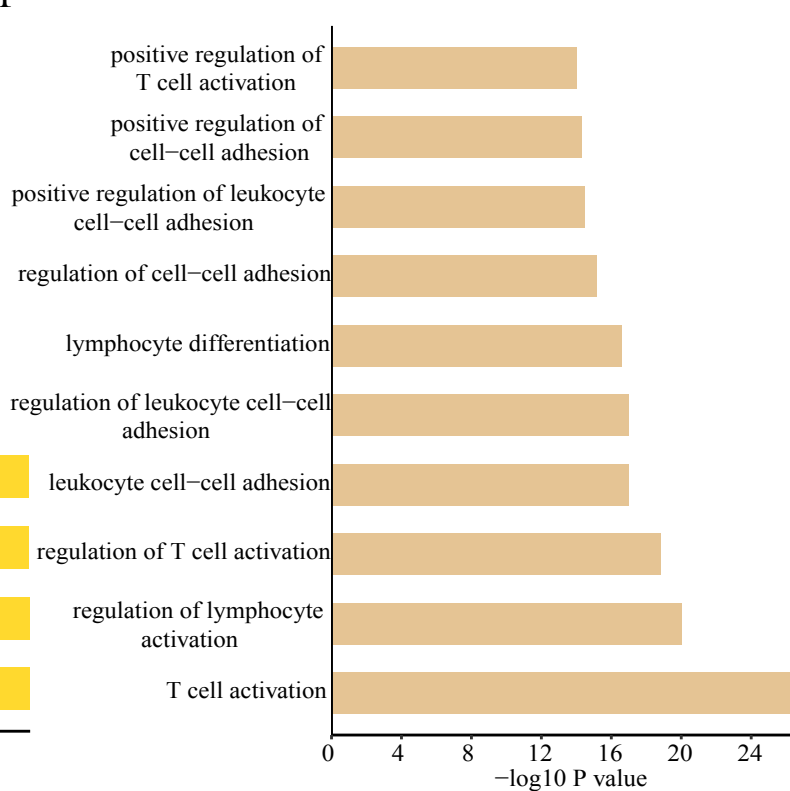

Supplement: Supplementary file 5 [file 757ba5cb80137c5927130222.pdf]
